# Supplementary material
Source: Springer Nature journal article supplement (https://www.springermedizin.de/resource/supplementary/12978_2010_84_MOESM1_ESM.pdf/9602806)
Supplement: MOESM1 [file 9602806]

**Vacillating between emotional  
confusion and sense of reality**

*Assessment for the  
diagnosis impact on  
the foetus well-being*

**Entering  
uncertainty**

**Involved in an  
ongoing change  
and adaptation**

*Mixed feelings  
Frightening silence  
Encountering the  
unexpected  
Broken expectations  
Being cared for or about*

*Trusting the professionals  
Wanting to know  
Needing support  
Knowledge as a strength  
Taking a new direction*
